# Supplementary material for: Older Adults with Multi-Morbidity: Medication Management Processes and Design Implications for Personal Health Applications
Source: PubMed Central journal article supplement (PMC3221383; doi:10.2196/jmir.1813), 2011-06-29
Supplement: jmir_v13i2e44_app2.pdf [file jmir_v13i2e44_app2.pdf]

## APPENDIX B: PARTICIPANT CHARACTERISTICS SURVEY

Participant ID# \_\_\_\_\_

Date: \_\_\_\_\_

Start time: \_\_\_\_\_

End time: \_\_\_\_\_

Recorder: \_\_\_\_\_

---

---

### DEMOGRAPHICS

1. Age: \_\_\_\_\_

2. Sex: Male  Female

3. Race/Ethnicity: *(as identified by participant)*

\_\_\_\_\_

4. Marital status: Married  Single (unmarried, widowed or divorced)

5. Ages of other members of the same household:

Spouse \_\_\_\_\_ Children \_\_\_\_\_ Others \_\_\_\_\_

\_\_\_\_\_

*[If possible, find out relationships of "others" to index individual]*

### PERCEIVED HEALTH STATUS

6. In general, would you say that your health is:

- Excellent
- Very good
- Good
- Fair
- Poor

**COMPUTER USE/SKILLS** *(pose to person who manages all or some of their own health information)*

7. Have you ever used a computer? Yes  No  *If NO, go to #8; If YES, go to #10*

8. Are you curious about using computers or interested in trying? Yes  No

*If NO, go to #9;*

*If YES, go to #10*

9. Do you mind sharing why you're not? (*Don't press if participant wishes not to respond.*)

*After response, END*

10. Do you have access to a computer? Yes  No  *If NO, go to #18; If YES, go to #11*

11. Where is that computer located? (e.g., in the home, at the library, a friend or family member's home, etc.)

12. Is that computer connected to the Internet? Yes  No  Don't know

13. Do you ever use that computer? Yes  No  *If NO, go to #14; If YES, go to #15*

14. Do you mind sharing why you don't? (*Don't press if participant wishes not to respond.*)

*After response, go to #18*

15. How often do you use that computer? (*Probe to find out hour many minutes/hours per time they use it*)

16. What applications or programs do you use? (*e.g., games, financial, word processing, E-mail, etc.*)

17. How often do you use \_\_\_\_\_? (*Ask about each application they list*)

18. Have you ever used the Internet? Yes  No  *If NO, END; If YES, go to #19*

19. Do you currently use the Internet? Yes  No  *If NO, go to #21; If YES, go to #20*

20. How often do you use the Internet?

21. What do you do (or have you done) on the Internet?
